1 **Tonotopy of the mammalian cochlea is associated with**  
2 **stiffness and tension gradients of the hair cell's tip-link**  
3 **complex.**

4 Mélanie Tobin<sup>1,2</sup>, Vincent Michel<sup>2,3,4</sup>, Nicolas Michalski<sup>2,3,4</sup>, Pascal Martin<sup>1,2,\*</sup>

5 <sup>1</sup> Laboratoire Physico-Chimie Curie, Institut Curie, PSL Research University, CNRS,  
6 UMR168, F-75248 Paris, France.

7 <sup>2</sup> Sorbonne Université, F-75252 Paris, France

8 <sup>3</sup> Laboratoire de Génétique et Physiologie de l'Audition, Institut Pasteur, Paris,  
9 France.

10 <sup>4</sup> UMRS 1120, Institut National de la Santé et de la Recherche Médicale (INSERM),  
11 Paris, France.

12

13

14 \* Correspondence: [pascal.martin@curie.fr](mailto:pascal.martin@curie.fr)

15

16

17

18 **ABSTRACT [150 words]** Frequency analysis of sound by the cochlea relies on sharp  
19 frequency tuning of mechanosensory hair cells along a tonotopic axis. To clarify the  
20 underlying biophysical mechanism, we have investigated the micromechanical properties of  
21 the hair cell's mechanoreceptive hair bundle in the rat cochlea. We studied both inner and  
22 outer hair cells, which send nervous signals to the brain and amplify cochlear vibrations,  
23 respectively. We find that tonotopy is associated with gradients of stiffness and resting  
24 mechanical tension, with steeper gradients for outer hair cells, emphasizing the division of  
25 labor between the two hair-cell types. We demonstrate that tension in the tip links that  
26 convey force to the mechano-electrical transduction channels increases at reduced  $\text{Ca}^{2+}$ .  
27 Finally, we reveal tonotopic gradients in stiffness and tension at the level of a single tip link.  
28 We conclude that intrinsic mechanical gradients of the tip-link complex help specify the  
29 characteristic frequency of the hair cell.

30

## 31 INTRODUCTION

32 The cochlea –the auditory organ of the inner ear– is endowed with a few thousands of  
33 mechanosensory hair cells that are each tuned to detect a characteristic sound frequency  
34 (Fettiplace and Kim, 2014). Different frequencies are detected by different cells, which are  
35 spatially distributed in the organ according to a frequency –or tonotopic– map (Lewis et al.,  
36 1982; Greenwood, 1990; Viberg and Canlon, 2004). Despite its critical importance for  
37 frequency analysis of complex sound stimuli, determining the mechanism that specifies the  
38 characteristic frequency of a given hair cell remains a major challenge of auditory physiology.

39 Although certainly not the only determinant of hair-cell tuning (Fettiplace and Fuchs,  
40 1999), we focus here on the contribution of the hair bundle, the cohesive tuft of cylindrical  
41 processes called stereocilia that protrude from the apical surface of each hair cell. The hair  
42 bundle works as the mechanical antenna of the hair cell (Hudspeth, 1989). Sound evokes  
43 hair-bundle deflections, which modulate tension in oblique proteinaceous tip links (Pickles et  
44 al., 1984; Kazmierczak et al., 2007) that interconnect the stereocilia near their tips. A change  
45 in tip-link tension affects the open probability of mechanosensitive ion channels, resulting in a  
46 mechano-electrical transduction current. The operating point of the transducer lies within the  
47 steep region of the sigmoidal relation between the transduction current and the hair-bundle  
48 position (Corey and Hudspeth, 1983; Russell and Sellick, 1983; Johnson et al., 2011). This  
49 key condition for sensitive hearing is thought to be controlled by tension in the tip links at rest  
50 (Hudspeth and Gillespie, 1994; Gillespie and Muller, 2009), as well as by extracellular and  
51 intracellular calcium (Corey and Hudspeth, 1983; Ricci et al., 1998; Fettiplace and Kim,  
52 2014), which is thought to stabilize the closed state of the transduction channels (Hacohen et  
53 al., 1989; Cheung and Corey, 2006). Tip-link tension has been estimated at ~8 pN in the  
54 bullfrog’s sacculus (Jaramillo and Hudspeth, 1993) but, to our knowledge, there has been no  
55 such report in the mammalian cochlea.

56 Adaptation continuously resets the mechanosensitive channels to a sensitive operating  
57 point when static deflections of the hair bundle threaten to saturate mechano-electrical  
58 transduction (Eatock, 2000). Most of the available evidence indicates that movements by  
59 molecular motors actively pulling on the tip links and calcium feedback on the open  
60 probability of transduction channels contribute to adaptation. With mammalian cochlear hair  
61 cells, however, the dependence of adaptation on  $\text{Ca}^{2+}$  entry has recently been the subject of  
62 significant controversy (Peng et al., 2013; Corns et al., 2014; Peng et al., 2016; Effertz et al.,  
63 2017). Motor forces and calcium feedback can also explain the active hair-bundle

64 movements, including spontaneous oscillations, that have been observed in various species  
65 (Fettiplace and Hackney, 2006; Martin, 2008). Active hair-bundle motility may contribute to  
66 hair-cell tuning by actively filtering and amplifying sound inputs (Hudspeth, 2008). These  
67 findings emphasize the importance of the tip-link complex (Michalski and Petit, 2015) –a  
68 protein assembly which includes the transduction channels, the tip links that convey sound-  
69 evoked forces to these channels, as well as the molecular motors that pull on the tip links– for  
70 mechanosensitivity of the hair cell.

71 Electrophysiological properties of the transduction apparatus, including the activation  
72 kinetics and the conductance of the transduction channels, as well as the kinetics of  
73 adaptation, have been shown to vary with the characteristic frequency of the hair cell (Ricci et  
74 al., 2003; Ricci et al., 2005; Fettiplace and Kim, 2014; Beurg et al., 2018). These  
75 observations suggest that hair-cell tuning may depend on the transducer itself (Ricci et al.,  
76 2005). In addition, it is a ubiquitous property of vertebrate auditory organs that the  
77 morphology of the hair bundle varies systematically with the characteristic frequency of the  
78 corresponding hair cell (Wright, 1984; Lim, 1986; Roth and Bruns, 1992; Tilney et al., 1992):  
79 going from the high-frequency to the low-frequency region of the organ, the hair bundle gets  
80 longer and comprises a progressively smaller number of stereocilia. These morphological  
81 gradients have long been recognized as circumstantial evidence that the mechanical properties  
82 of the hair bundle might be involved in frequency tuning (Turner et al., 1981; Flock and  
83 Strelioff, 1984; Fettiplace and Fuchs, 1999). However, a detailed characterization of  
84 mechanical gradients at the level of the whole hair bundle is lacking, in particular to clarify  
85 the contribution of the tip-link complex to these gradients.

86 In this work, we probed passive and active hair-bundle mechanics along the tonotopic axis  
87 of an excised preparation of the rat cochlea (Fig. 1). We worked both with inner hair cells,  
88 which convey auditory information to the brain and are considered as the true sensors of the  
89 organ, and outer hair cells, which are mostly dedicated to cochlear amplification of sound-  
90 evoked vibrations (Hudspeth, 2014). We combined fluid-jet stimulation to deflect the hair  
91 bundle, iontophoresis of a calcium chelator (EDTA) to disrupt the tip links and measure  
92 bundle movements resulting from tension release by these links, and patch-clamp recordings  
93 of transduction currents to infer the number of intact tip links contributing to the response.  
94 From these measurements, we estimated the stiffness of the whole hair bundle, the  
95 contribution of the tip links and of the stereociliary pivots to this stiffness, as well as the  
96 resting tension in the tip links. Our results reveal mechanical gradients of the tip-link

97 complex according to the tonotopic map and to the division of labor between sensory inner  
98 and amplificatory outer hair cells, providing evidence for the implication of the tip-link  
99 complex to frequency tuning of cochlear hair cells.

100

## 101 **RESULTS**

102 **The hair-bundle stiffness increases along the tonotopic axis.** Using a calibrated fluid jet  
103 (Methods; Figure 2–supplementary text; Figure supplements 1-4), we measured the stiffness  
104 of single hair bundles along the tonotopic axis of the rat cochlea, going from the very apex of  
105 the organ to mid-cochlear locations (Fig. 1). For outer hair cells, we found that a given series  
106 of force steps evoked hair-bundle deflections that decreased in magnitude towards more basal  
107 locations along the tonotopic axis (Fig. 2A). Correspondingly, the slope of a bundle’s force-  
108 displacement relation (Fig. 2B), and thus stiffness, increased with the characteristic frequency  
109 of the hair cell. The same behavior was observed for inner hair cells (Fig. 2C-D).  
110 Remarkably, the stiffness gradient was steeper (\* $p < 0.05$ ; Figure 2–table supplement 1) for  
111 outer hair cells than for inner hair cells (Fig. 2E). As the characteristic frequency increased  
112 from 1 to 4 kHz, the hair-bundle stiffness  $K_{HB}$  showed a 3.4-fold increase from  $3.7 \pm 0.3$  mN/m  
113 ( $n = 19$ ) to  $12.7 \pm 0.7$  mN/m ( $n = 21$ ) for outer hair cells, but only a 2.2-fold increase from  
114  $2.6 \pm 0.3$  mN/m ( $n = 19$ ) to  $5.7 \pm 0.6$  mN/m ( $n = 19$ ) for inner hair cells. At the 15-kHz position,  
115 where stiffness could only be recorded for inner hair cells (see Methods),  $K_{HB} =$   
116  $8.2 \pm 0.6$  mN/m ( $n = 14$ ), thus still significantly lower (\*\* $p < 0.001$ ; Figure 2–table  
117 supplement 1) than in outer hair cells at the 4-kHz position. At each cochlear position, outer  
118 hair-cell bundles were stiffer than inner hair-cell bundles, with a stiffness ratio that increased  
119 from the apex to the base of the organ.

120 **Parsing out the relative contributions of gating springs and stereociliary pivots to hair-**  
121 **bundle stiffness.** There are two contributions to the stiffness of a hair bundle:  $K_{HB} = K_{GS} +$   
122  $K_{SP}$ . First, hair-bundle deflections modulate the extension of elastic elements –the gating  
123 springs that control the open probability of the mechano-electrical transduction channels; we  
124 denote by  $K_{GS}$  their contribution to hair-bundle stiffness. Second, bending of the actin core of  
125 the stereocilia at the stereociliary pivots, as well as stretching horizontal lateral links that  
126 interconnect the stereocilia, provides the remaining contribution  $K_{SP}$ . Because the gating  
127 springs are in series with the tip links, disrupting the tip links affords a means to estimate both  
128  $K_{GS}$  and  $K_{SP}$ . We used local iontophoretic application of a  $Ca^{2+}$  chelator (EDTA; Methods  
129 and Fig. 1) to disengage the  $Ca^{2+}$ -dependent adhesion of the cadherin-related molecules

130 forming each tip link (Kazmierczak et al., 2007). From the increased magnitude of the hair-  
131 bundle response to a given mechanical stimulus (see an example in Fig. 4A), we found that  
132 the gating springs contributed up to 50% of the total hair-bundle stiffness  $K_{HB}$ . Averaging  
133 over all inner and outer hair cells that we tested, the relative contribution of the gating springs  
134 was  $r = K_{GS}/K_{HB} = 22 \pm 2\%$  ( $n = 71$ ; Figure 3–figure supplement 1), where  $1 - r$  is the  
135 amplitude ratio of hair-bundle movements before and after tip-link disruption. Both inner and  
136 outer hair cells displayed a gradient of gating-spring stiffness  $K_{GS} = r K_{HB}$  (Fig. 3A).  
137 Between the 1-kHz and the 4-kHz positions, the 6.6-fold increase that we measured for outer  
138 hair cells was significantly larger (\*\* $p < 0.01$ ; Figure 3–table supplement 2) than the 3.7-fold  
139 increase observed for inner hair cells. Similarly, the contribution  $K_{SP} = (1 - r) K_{HB}$  of the  
140 stereociliary pivots to hair-bundle stiffness displayed tonotopic gradients for both inner and  
141 outer hair cells (Fig. 3B).

#### 142 **Individual gating springs are stiffer in hair cells with higher characteristic frequencies.**

143 Both the pivot stiffness  $K_{SP}$  and the gating-spring stiffness  $K_{GS}$  are expected to vary  
144 according to hair-bundle morphology. Hair bundles get shorter and are composed of more  
145 numerous stereocilia as one progresses from the apex to the base of the cochlea (Figure 3–  
146 figure supplement 2), which ought to promote higher stiffness values. Are morphological  
147 gradients sufficient to explain the observed stiffness gradients of the hair bundle? Accounting  
148 for morphology, we write  $K_{SP} = \kappa N_{SP}/h^2$  and  $K_{GS} = k_{GS} N_{TL}\gamma^2$ , in which  $h$ ,  $N_{SP}$ ,  $N_{TL}$   
149 correspond, respectively, to the height, the number of stereocilia and the number of (intact) tip  
150 links of the hair bundle, whereas  $\gamma \propto 1/h$  is a geometrical projection factor (Figure 3–figure  
151 supplements 1-3). Remarkably, the intrinsic rotational stiffness  $\kappa$  of a single stereocilium in  
152 outer hair cells remained the same across the positions that we explored (Fig. 3C; Figure 3–  
153 table supplement 2). Similarly, with inner hair cells, there was no significant variation of the  
154 rotational stiffness between the 1- and 2-kHz locations as well as between the 4- and 15-kHz  
155 locations, although we observed a 2-fold stiffness increase between the 2- and 4-kHz  
156 locations (Figure 3–table supplement 2). Averaging over the ensembles of outer and inner  
157 hair cells that we probed, the rotational stiffness  $\kappa = 1.8 \pm 0.2$  fN·m/rad ( $n = 78$ ) in outer hair  
158 cells was about 2.5-fold higher than the value  $\kappa = 0.8 \pm 0.1$  fN·m/rad ( $n = 136$ ) measured in  
159 inner hair cells. In contrast, the intrinsic stiffness  $k_{GS}$  of a single gating spring increased 2.9  
160 fold from  $1.9 \pm 0.5$  ( $n = 20$ ) to  $5.5 \pm 0.7$  mN/m ( $n = 30$ ) in outer hair cells and 3.6 fold from  
161  $0.7 \pm 0.1$  ( $n = 44$ ) to  $2.5 \pm 0.4$  mN/m ( $n = 21$ ) in inner hair cells, for characteristic frequencies  
162 that increased from 1 to 4 kHz and from 1 to 15 kHz, respectively (Fig. 3D). Thus,

163 morphological gradients can account for the observed gradient in pivot stiffness  $K_{SP}$ , but not  
164 for the observed gradient in gating-spring stiffness  $K_{GS}$  and in turn for the whole hair-bundle  
165 stiffness  $K_{HB}$ . The hair-bundle morphology is not the sole determinant of hair-bundle  
166 mechanics.

167 **Tip-link tension increases along the tonotopic axis.** We then estimated the resting  
168 mechanical tension in the tip links, *i.e.* in the absence of an external stimulus. The  
169 transduction channels close when the tip links are disrupted, indicating that the channels are  
170 inherently more stable in a closed state (Assad et al., 1991; Beurg et al., 2008; Indzhykulian et  
171 al., 2013). In functional hair bundles, tip-link tension is thought to bring the operating point  
172 of the transducer within the steep region of the sigmoidal relation between the channels' open  
173 probability and the position of the hair bundle, ensuring sensitive detection of hair-bundle  
174 deflections. If there is tension in the tip links, then disrupting these links must result in a  
175 positive offset in the resting position of the hair bundle (Assad et al., 1991; Jaramillo and  
176 Hudspeth, 1993).

177 In response to iontophoresis of a  $Ca^{2+}$  chelator (EDTA), we observed a net positive  
178 movement  $\Delta X_R$  of the hair bundle at steady state, as expected if the tip links broke and  
179 released tension (Fig. 4A). Consistent with tip-link disruption, this movement was associated  
180 with a decrease in hair-bundle stiffness, as well as with closure of the transduction channels  
181 and loss of transduction (Fig. 4B). The positive offset in resting position upon tip-link  
182 disruption was observed at all positions that we explored along the tonotopic axis of the  
183 cochlea, both for inner and outer hair cells, demonstrating that the hair bundles were indeed  
184 under tension (Fig. 5A). In addition, we observed that the magnitude of the evoked  
185 movement increased significantly (\*\* $p < 0.01$ ; Figure 5–table supplement 1) from  $9 \pm 3$  nm  
186 ( $n = 13$ ) to  $45 \pm 10$  nm ( $n = 12$ ) for outer hair cells with characteristic frequencies that  
187 increased from 1 to 4 kHz. In contrast, we observed no significant difference among inner  
188 hair cells with characteristic frequencies that varied within the 1–15-kHz range ( $p > 0.05$ ;  
189 Figure 5–table supplement 1): the positive offset was  $21 \pm 2$  nm ( $n = 71$ ) over the whole  
190 ensemble of inner hair cells.

191 As a result, within the range of cochlear locations that we explored, we measured a steep  
192 gradient of hair-bundle tension for outer hair cells but a comparatively weaker gradient  
193 ( $*p < 0.05$ ; Figure 5–table supplement 1) for inner hair cells (Fig. 5B). Tension  $T_R = K_{SP} \Delta X_R$   
194 in the hair bundle was estimated as the product of the pivot stiffness  $K_{SP}$  and the positive  
195 offset  $\Delta X_R$  in resting position evoked by tip-link disruption (Methods). The hair-bundle



196 tension showed a 13.6-fold increase from  $27 \pm 10$  pN ( $n = 14$ ) to  $366 \pm 87$  pN ( $n = 16$ ) for outer  
197 hair cells (characteristic frequencies: 1–4 kHz) but only a 4.1-fold increase from  $37 \pm 7$  pN  
198 ( $n = 31$ ) to  $149 \pm 33$  pN ( $n = 11$ ) for inner hair cells (characteristic frequencies: 1–15 kHz).  
199 Tension in the hair bundle resulted from the summed contributions of tension in individual tip  
200 links. Dividing the tension  $T_R$  by the average number  $N_{TL}$  of intact tip links in our recordings  
201 and projecting the result along the oblique axis of the tip links (projection factor  $\gamma$ ) provided  
202 estimates of the tension  $t_R = T_R / (\gamma N_{TL})$  in a single tip link. Remarkably, the observed  
203 gradients in hair-bundle tension (Fig. 5B) were not only due to an increase in the number of  
204 tip links that contributed to this tension (Figure 3–figure supplement 3), for tension in a single  
205 tip link also showed gradients (Fig. 5C). The single tip-link tension was comparable in the  
206 two types of cells at the 1-kHz location:  $6.9 \pm 2.9$  pN ( $n = 22$ ) for outer hair cells and  
207  $9.0 \pm 1.9$  pN ( $n = 42$ ) for inner hair cells. However, at the 4-kHz location, the single tip-link  
208 tension had increased 7.2 fold to  $50 \pm 12$  pN ( $n = 18$ ) in outer hair cells but only 2.7 fold to  
209  $24 \pm 6$  pN ( $n = 16$ ) in inner hair cells; at the 15-kHz location, tip-link tension in inner hair cells  
210 was  $28 \pm 7$  pN ( $n = 17$ ). A linear regression of the relation between the single tip-link tension  
211 and the characteristic frequency confirmed that the gradient was significantly ( $*p < 0.05$ ;  
212 Figure 5–table supplement 1) steeper for outer hair cells.

213 **Tip-link tension first increases upon  $Ca^{2+}$  chelation.** The dynamic response to an  
214 iontophoretic step of EDTA, and thus to a decrease of the extracellular  $Ca^{2+}$  concentration,  
215 was biphasic. The hair bundle first moved in the negative direction (arrowhead in Fig. 4A),  
216 before the directionality of the movement reverted and the bundle showed the positive  
217 movement associated with tip-link disruption. The negative movement was associated with  
218 an increased inward current of similar time course (Fig. 4B). Within the framework of the  
219 gating-spring model of mechano-electrical transduction (Corey and Hudspeth, 1983; Markin  
220 and Hudspeth, 1995), this observation is readily explained if the evoked decrease in the  
221 extracellular  $Ca^{2+}$  concentration resulted in an increase in gating-spring tension, which both  
222 pulled the hair bundle in the negative direction and led to the opening of the transduction  
223 channels.

224 The magnitude of the negative movement at the peak showed no significant gradient and  
225 was similar between inner and outer hair cells, with an average magnitude of  $\Delta X_{Ca} =$   
226  $-26 \pm 2$  nm over the whole ensemble of hair cells ( $n = 83$ ; Fig. 6A). However, because  
227 morphological gradients (Figure 3–figure supplement 2) resulted in gradients of pivot  
228 stiffness  $K_{SP}$  (Fig. 3B), the maximal increase  $\Delta T = -K_{SP} \Delta X_{Ca}$  in hair-bundle tension was



229 larger for hair cells with higher characteristic frequencies (Fig. 6B), as was the maximal  
230 tension  $t_{\max}$  that a single tip link sustained before tip-link disruption (Fig. 6C). Going from  
231 1-kHz to 4-kHz locations, this maximal tip-link tension displayed a gradient from  $21 \pm 6$  pN  
232 ( $n = 29$ ) to  $80 \pm 17$  pN ( $n = 22$ ) in outer hair cells and from  $23 \pm 4$  pN ( $n = 42$ ) to  $66 \pm 11$  pN  
233 ( $n = 16$ ) in inner hair cells; at the 15-kHz location, the maximal tension was not significantly  
234 different than at the 4-kHz location in inner hair cells.

235 When immersing the hair cells in low- $\text{Ca}^{2+}$  saline, the negative movement was always  
236 followed by tip-link disruption and could thus not be observed twice with the same hair  
237 bundle. However, in six different preparations for which the hair bundle was immersed in  
238 saline with a higher  $\text{Ca}^{2+}$  concentration ( $500 \mu\text{M}$ ) than usual ( $20 \mu\text{M}$ ), we were able to  
239 preserve the integrity of the tip links and demonstrate that the negative movements could be  
240 reversible (Fig. 6D). Under such conditions, we observed that the absolute magnitude and the  
241 speed of the negative movement increased with the magnitude of the iontophoretic current.  
242 Notably, the hair bundle reached a new steady-state position when the iontophoretic step was  
243 long enough (Fig. 6E), suggesting that resting tension in the tip links could be modulated by  
244 the extracellular  $\text{Ca}^{2+}$  concentration, with higher tensions at lower  $\text{Ca}^{2+}$  concentrations.

## 245 **DISCUSSION**

246 Tonotopy of the mammalian cochlea is known to be associated with gradients of hair-bundle  
247 morphology (Wright, 1984; Lim, 1986; Roth and Bruns, 1992; Tilney et al., 1992), as well as  
248 of electrophysiological properties of the transduction apparatus (Ricci et al., 2003; Ricci et al.,  
249 2005; Fettiplace and Kim, 2014; Beurg et al., 2018). The work presented here reveals that  
250 tonotopy is also associated with gradients of intrinsic mechanical properties of the hair cell's  
251 tip-link complex. Specifically, by dissecting the relative contributions of the tip links and of  
252 the stereociliary pivots to the micromechanical properties of the hair bundle, we found that the  
253 gating springs that control the open probability of the mechano-electrical transduction channels  
254 are stiffer (Fig. 3D) and subjected to higher mechanical tension (Fig. 5C) in hair cells that  
255 respond to higher characteristic frequencies. In return, our data suggests that the tip-link  
256 complex plays a mechanical role in the complex process that sets the characteristic frequency  
257 of the hair cell.

258 The stiffness  $K_{\text{HB}}$  of the whole hair bundle displayed steeper gradients than those expected  
259 using the rough estimate  $K_{\text{HB}} \propto N_{\text{SP}}/h^2$  from morphological changes (Figure 3-figure  
260 supplement 2) in length  $h$  and number of stereocilia  $N_{\text{SP}}$ . Computing the relative difference  
261 in stiffness ratio between the two extreme cochlear locations that we were able to probe, we

262 roughly estimate that the measured stiffness ratios (Fig. 2E) were 51% and 66% larger than  
263 those expected from morphology for outer and inner hair cells, respectively. We interpret this  
264 result as the consequence of intrinsic gradients of the single gating-spring stiffness (Fig. 3D).  
265 Further emphasizing mechanical regulation at the level of the tip-link complex, we also  
266 observed that the rotational stiffness of a single stereocilium was nearly uniform across the  
267 cochlear locations that we tested, especially in outer hair cells (Fig. 3C). Stiffness gradients  
268 of hair bundles with disrupted tip links are thus entirely determined by morphology, in  
269 contradistinction to intact hair bundles.

270 Our experiments were performed with hair cells from juvenile animals (P7-P10), before  
271 the onset of hearing. Hair-cell maturation progresses from base to apex in the cochlea (Wu  
272 and Kelley, 2012), which may thus have affected our estimates of mechanical gradients of the  
273 tip-link complex. However, because 92% percent of our recordings were performed at P8 or  
274 later (Methods), the tip-link complex ought to be nearly mature in our experiments, at least in  
275 outer hair cells (Roth and Bruns, 1992; Waguespack et al., 2007; Beurg et al., 2018). In inner  
276 hair cells, we cannot exclude that maturation of the hair-bundle morphology was still  
277 proceeding at the most apical cochlear positions explored in our study (Peng et al., 2009).  
278 Maturation sharpens the apex-to-base gradient of bundle length (Roth and Bruns, 1992);  
279 based on bundle morphology only, we would expect to underestimate stiffness gradients with  
280 immature inner hair cells.

281 **How stiffness gradients may contribute to the tonotopic map.** We observed a ~3.4-fold  
282 increase of hair-bundle stiffness over two octaves (1–4 kHz) of characteristic frequencies for  
283 outer hair cells and a similar increase but over 4 octaves (1–15 kHz) for inner hair cells  
284 (Fig. 2E). Whether or not stiffness would continue increasing along the same gradient  
285 towards more basal locations of the cochlea is unknown. If it were the case, we would expect  
286 a base-to-apex stiffness ratio of ~40 for outer hair cells, which is comparable to the base-to-  
287 apex ratio of characteristic frequencies in the rat cochlea (range: 0.5-50 kHz; (Viberg and  
288 Canlon, 2004)), but only of ~6 for inner hair cells. The interplay between the stiffness and  
289 mass of a hair bundle could in principle help specify the preferred frequency of vibration of  
290 the hair cell through passive mechanical resonance with sound stimuli (Frishkopf and  
291 DeRosier, 1983; Holton and Hudspeth, 1983; Manley et al., 1988; Freeman and Weiss, 1990;  
292 Gummer et al., 1996). The resonance frequency  $\omega_c = \sqrt{k/m}$  of a spring-mass system is  
293 given by the square root of the system's stiffness  $k$  divided by the mass  $m$ ; it thus increases  
294 with stiffness, but relatively slowly. Assuming for simplicity that the bundle's mass remains

295 nearly the same along the tonotopic axis (Tilney and Tilney, 1988), two orders of magnitude  
296 in frequency must be produced by a 10,000-fold increase in stiffness, corresponding to much  
297 steeper gradients than those reported here.

298 Alternatively, it has been proposed that the hair bundle could actively resonate with sound  
299 as the result of spontaneous oscillations (Martin et al., 2001; Hudspeth, 2008). Within this  
300 framework, the characteristic frequency is set by the frequency of the oscillator, which is  
301 expected to increase with the stiffness of the hair bundle (Vilfan and Duke, 2003; Tinevez et  
302 al., 2007; Martin, 2008; Barral et al., 2018). Notably, the relation may be steeper than that  
303 resulting from a passive spring-mass system, possibly approximating a linear dependence  
304 (Hudspeth et al., 2010). In this case, the stiffness gradient observed here (Fig. 2E) for outer  
305 hair cells, but not for inner hair cells, could be steep enough to be a major determinant of the  
306 tonotopic map.

307 **Functional role of tension gradients.** Tip-link tension is thought to control the open  
308 probability of the transduction channels, with higher tension promoting opening of the  
309 channels (Hudspeth and Gillespie, 1994). On this basis, a gradient of tip-link tension  
310 (Fig. 5C) ought to result in a gradient of open probability. Yet, it has been shown in outer  
311 hair cells that the channels' open probability –the operating point of the transducer– remains  
312 remarkably uniform along the tonotopic axis, near a value of  $\frac{1}{2}$  (Johnson et al., 2011). To  
313 explain this observation, we note that the tension gradient for outer hair cells is associated  
314 with a gradient of single-channel conductance (Beurg et al., 2006; Beurg et al., 2015; Beurg et  
315 al., 2018). As a consequence, the magnitude of the  $\text{Ca}^{2+}$  influx into transducing stereocilia is  
316 expected to increase with the characteristic frequency of the hair cell. Manipulations that  
317 affect the extracellular or the intracellular  $\text{Ca}^{2+}$  concentration indicate that the transduction  
318 channels close at increased  $\text{Ca}^{2+}$  concentrations (reviewed in (Fettiplace and Kim, 2014)),  
319 possibly because the channels are harder to open when the  $\text{Ca}^{2+}$  concentration is higher near  
320 the channel's pore (Cheung and Corey, 2006). Thus, the gradient of tip-link tension reported  
321 here (Fig. 5C) may compensate for the effects of the conductance gradient on the open  
322 probability: channels with higher conductance impart higher  $\text{Ca}^{2+}$  influxes (closing the  
323 channels) but are also subjected to higher tension (opening the channels), perhaps maintaining  
324 an optimal operating point for the transducer at all cochlear locations.

325 Tension in the tip links is thought to be produced actively by pulling forces from molecular  
326 motors interacting with the actin core of the stereocilia at the upper insertion point of the tip  
327 link (Gillespie and Muller, 2009). The observed tension gradient in turn implies that, towards

328 basal cochlear locations, there are more motors or that each motor exerts higher forces than  
329 near the apex. Notably, the tip links of inner-hair-cell bundles were found to bear less tension  
330 than those of outer hair cell (Fig. 5B-C). This property qualitatively makes sense, for the  
331 open probability of the transduction channels is thought to be smaller in inner hair cells than  
332 in outer hair cells (Russell and Sellick, 1983). There is also no, or only a weak, gradient of  
333 the single-channel conductance in inner hair cells (Beurg et al., 2006; Beurg et al., 2018),  
334 which parallels the relatively weak gradient of tip-link tension observed here.

335 **Tip-link tension may be high enough to alter tip-link conformation and affect gating-**  
336 **spring stiffness.** The tip link is composed of the association of two cadherin-related  
337 proteins, cadherin-23 and protocadherin-15 (PCDH15) (Kazmierczak et al., 2007). Molecular  
338 dynamics simulations have suggested that a bend between extracellular cadherin (EC) repeats  
339 9 and 10 of PCDH15 may confer some compliance to otherwise rigid tip links (Araya-Secchi  
340 et al., 2016). Tensions higher than  $\sim 10$  pN are predicted to evoke complete unbending of  
341 EC9-10, resulting in significant stiffening of the tip link. Assuming that PCDH15 in the tip  
342 link forms a dimer (Kazmierczak et al., 2007; Ge et al., 2018) and that tip-link tension is  
343 equally shared by the two filaments, our estimates of tip-link tension (Fig. 5C) are compatible  
344 with a contribution of the bending elasticity of EC9-10 to gating-spring stiffness at the apex of  
345 the rat cochlea, especially in inner hair cells. In outer hair cells, as one progresses from the  
346 very apex towards more basal cochlear locations, tension may quickly become too high to  
347 allow a bent conformation in EC9-10. At the 4-kHz location, we estimated a resting tip-link  
348 tension of  $\sim 50$  pN. Taking the measured unfolding forces of Ig domains in titin as a reference  
349 (Rief et al., 1997), tip-link tension might actually be high enough to evoke unfolding of EC  
350 domains, at least under resting conditions or at physiological loading rates. Whether or not  
351 unfolding a various number of EC domains can contribute to a gradation of gating-spring  
352 stiffness remains to be explored (Bartsch and Hudspeth, 2018).

353 Notably, the estimated gradients of gating-spring tension (Fig. 5C) were associated with  
354 gradients of gating-spring stiffness (Fig. 3D): stiffer gating springs are subjected to more  
355 resting tension. Strain stiffening is a common phenomenon associated with the entropic  
356 elasticity of macromolecules as well as with filamentous protein networks (Bustamante et al.,  
357 1994; Rief et al., 1997; Kang et al., 2009). A tension gradient may thus in part explain the  
358 existence of the observed gradient of gating-spring stiffness. Alternatively, the gating-spring  
359 stiffness could vary if the gating spring were composed of a variable number of compliant  
360 molecules operating in parallel and connected to a single tip link. Consistent with this

361 hypothesis, it has recently been suggested that the number of TMC1-dependent transduction  
362 channels increases by ~2.5-fold in outer hair cells but shows nearly no gradient in inner hair  
363 cells from the apex to the base of the mouse cochlea (Beurg et al., 2018). If each channel  
364 were associated with its own gating spring, the number of transduction channels per tip link  
365 would directly control the effective stiffness of the tip-link complex. This mechanism could  
366 contribute to the stiffness gradients reported here (Fig. 3D). However, for outer hair cells, we  
367 found that the stiffness of the tip-link complex increased by ~3-fold over a region spanning  
368 only 20% of the cochlear tonotopic axis (Fig. 3D), whereas the conductance associated with a  
369 single tip-link varies by a similar amount over the whole cochlear length (Beurg et al., 2006;  
370 Beurg et al., 2018). Thus, if there is a relation between stiffness and conductance of a single  
371 tip-link complex, this relation cannot simply be proportional.

372 **Tip-link tension depends on calcium.** Upon iontophoretic application of a  $\text{Ca}^{2+}$  chelator  
373 (EDTA), before tip-link disruption, we observed that the hair bundle first moved in the  
374 negative direction and that this movement was associated with a concomitant opening of the  
375 transduction channels (Fig. 4). Calcium acts as a permeant channel blocker of the  
376 transduction channels (Fettiplace and Kim, 2014). Lowering the extracellular  $\text{Ca}^{2+}$   
377 concentration is thus expected to increase the magnitude of the current flowing through open  
378 transduction channels but not to produce hair-bundle movements, at least as the result of  
379 block release only. A decrease of the extracellular  $\text{Ca}^{2+}$  concentration also promotes opening  
380 of the transduction channels (Hacohen et al., 1989; Johnson et al., 2011). Within the  
381 framework of the gating-spring model of mechano-electrical transduction, channel opening  
382 must reduce gating-spring extension and in turn tension, fostering *positive* movements of the  
383 hair bundle. Thus, the observed *negative* movements cannot result from internal forces  
384 associated with channel gating. Instead, our observations are readily explained if the evoked  
385 reduction of extracellular  $\text{Ca}^{2+}$  concentration resulted in an increase of tip-link (and thus  
386 gating-spring) tension. If tip-link tension at rest is set by myosin molecular motors that pull  
387 on the tip links (Hudspeth and Gillespie, 1994), then the motor force must increase at  
388 decreased  $\text{Ca}^{2+}$  concentrations.

389 Interestingly, depolarization of rat outer hair cells was previously shown to evoke positive  
390 movements of the hair bundle (Kennedy et al., 2006). Both depolarization and chelation of  
391 extracellular  $\text{Ca}^{2+}$  are expected to reduce the intracellular  $\text{Ca}^{2+}$  concentration in the vicinity of  
392 the transduction channel's pore. Yet, the directionality of active hair-bundle movements is  
393 opposite in the two studies, suggesting that the hair bundle can operate in two regimes  
394 (Tinevez et al., 2007). In the first regime (Kennedy et al., 2006), the response to  $\text{Ca}^{2+}$  changes

395 is dominated by gating forces (Howard and Hudspeth, 1988) so that the resting tension in the  
396 tip links is nearly the same before and after application of the stimulus. In the other regime  
397 (our study),  $\text{Ca}^{2+}$ -evoked changes of the resting tension in the tip links (Fig. 6) dominate  
398 gating forces. In the chicken cochlea, depolarization of the hair cell was reported to evoke  
399 negative movements of the hair bundle (Beurg et al., 2013), a directionality in agreement with  
400 that found here (Fig. 4A). In addition, it has been shown in the bullfrog's sacculus (Tinevez  
401 et al., 2007) and the turtle's cochlea (Ricci et al., 2002) that the response of different hair cells  
402 to a given  $\text{Ca}^{2+}$  change can be of either directionality and that the directionality of the  
403 response for a given hair cell can even be reversed by applying a position offset to the hair  
404 bundle. The two regimes of active hair-bundle motility can thus potentially coexist within the  
405 same hair cell, but only if gating forces are strong enough (Tinevez et al., 2007). We  
406 measured force-displacement relations that were remarkably linear (Fig. 2B and D), showing  
407 no sign of gating compliance (Howard and Hudspeth, 1988). This observation confirms that  
408 gating forces were relatively weak under our experimental conditions, although others have  
409 shown that gating compliance can be measured with mammalian cochlear hair cells (Russell  
410 et al., 1992; Kennedy et al., 2005).

411 The effect of  $\text{Ca}^{2+}$  on mechano-electrical transduction has recently been the subject of  
412 significant debate and controversy (Peng et al., 2013; Corns et al., 2014). We showed here  
413 that the response of rat cochlear hair bundles to iontophoretic  $\text{Ca}^{2+}$  changes are remarkably  
414 similar to that reported with hair cells from non-mammalian vertebrates (Jaramillo and  
415 Hudspeth, 1993): tip-link tension depends on the extracellular  $\text{Ca}^{2+}$  concentration, giving rise  
416 to active hair-bundle movements in response to  $\text{Ca}^{2+}$  changes (Figs. 4 and 6).

417 **Mechanical gradients reflect the division of labor between inner and outer hair cells.**  
418 Stiffness (Fig. 2E) and tension (Fig. 5B) gradients were steeper for outer hair cells, which  
419 serve primarily as mechanical amplifiers of sound-evoked vibrations, than for inner hair cells,  
420 the true sensors of the inner ear. Other properties, such as the height of the hair bundle  
421 (Wright, 1984; Lim, 1986; Roth and Bruns, 1992) or the conductance of the transduction  
422 channels (Beurg et al., 2006; Beurg et al., 2018), show a similar behavior. These observations  
423 suggest that cochlear amplification near a characteristic frequency imposes stringent  
424 constraints on the tip-link complex of outer hair cells. Consequently, our data fosters the  
425 hypothesis that the hair bundle and its transduction machinery are involved in this active  
426 process (Hudspeth, 2014).

427

428



## 429 **METHODS**

430 **Experimental preparation.** All experimental procedures were approved by the Ethics  
431 committee on animal experimentation of the Institut Curie; they complied with the European  
432 and French-National Regulation for the Protection of Vertebrate Animals used for  
433 Experimental and other Scientific Purposes (Directive 2010/63; French Decree 2013-118).  
434 Experiments were performed on excised cochlear coils of Sprague Dawley rats (Janvier Labs)  
435 between postnatal day 7 and 10 (P7–P10), with 8% of the cells at P7, 75% at P8–P9 and 17%  
436 at P10. The dissection of the cochlea followed a published procedure (Kennedy et al., 2003).  
437 In short, we cracked open the bony shell covering the cochlear tissue, unwound the cochlear  
438 tube from the modiolus, removed the stria vascularis, and gently peeled the tectorial  
439 membrane. Apical or middle turns of the organ of Corti were positioned under strands of  
440 nylon fibres in the experimental chamber. We recorded from inner hair cells at 4 positions  
441 along the longitudinal axis of the cochlea (Fig. 1A), corresponding to fractional distances of  
442 5%, 10%, 20%, and 50% from the cochlear apex. According to the tonotopic map in this  
443 species (Viberg and Canlon, 2004), these cells were tuned at characteristic frequencies of 1, 2,  
444 4, and 15 kHz, respectively. We also recorded from outer hair cells but only at the first three  
445 positions along the tonotopic axis. Farther towards the cochlear base, the hair bundles were  
446 too small to be clearly visualized and mechanically stimulated.

447 The tissue was bathed in a standard saline containing 150 mM NaCl, 6 mM KCl, 1.5 mM  
448 CaCl<sub>2</sub>, 2 mM Na-pyruvate, 8 mM glucose and 10 mM Na-HEPES. In some experiments, we  
449 used a low-Ca<sup>2+</sup> saline containing 150 mM NaCl, 6 mM KCl, 3.3 mM CaCl<sub>2</sub>, 4 mM HEDTA,  
450 2 mM Na-pyruvate, 8 mM glucose, and 10 mM Na-HEPES. As measured with a Ca<sup>2+</sup>-  
451 sensitive electrode, this solution had a free Ca<sup>2+</sup> concentration of 22 μM, similar to that found  
452 in rat endolymph (Bosher and Warren, 1978). All solutions had a pH of 7.4 and an osmotic  
453 strength of 315 mOsm·kg<sup>-1</sup>. Experiments were performed at a room temperature of 20–25°C.

454 **Microscopic Apparatus.** The preparation was viewed through a ×60 water-immersion  
455 objective of an upright microscope (BX51WI, Olympus). Individual hair bundles were  
456 imaged at a magnification of ×1,000 onto a displacement monitor that included a dual  
457 photodiode. Calibration was performed before each recording by measuring the output  
458 voltages of the monitor in response to a series of offset displacements of the photodiode. For  
459 hair-bundle movements that did not exceed ±150 nm in the sample plane, the displacement  
460 monitor was linear.



461 **Iontophoresis of a Ca<sup>2+</sup> Chelator.** We used iontophoresis to apply the calcium chelator  
462 EDTA in the vicinity of a hair bundle (Fig. 1B) and disrupt its tip links (Assad et al., 1991;  
463 Jaramillo and Hudspeth, 1993; Marquis and Hudspeth, 1997). Coarse microelectrodes were  
464 fabricated from borosilicate capillaries with a pipette puller (P97, Sutter Instrument); their  
465 resistance was 1 MΩ when filled with 3 M KCl and immersed in the same solution. In  
466 experiments, the electrodes were filled with a solution containing 100 mM EDTA and 25 mM  
467 KCl. The electrode's tip was positioned at ~3 μm from the hair bundle. A holding current of  
468 +10 nA was continuously applied to counteract the diffusive release of EDTA from the  
469 electrode. The stimulus consisted of a -100-nA current step on top of the holding current,  
470 resulting in a net iontophoretic current of -90 nA. To facilitate tip-link disruption upon  
471 EDTA iontophoresis, the cochlear tissues were immersed in low-Ca<sup>2+</sup> saline (~20-μM Ca<sup>2+</sup>).

472 **Mechanical stimulation and stiffness measurements.** The hair bundles of inner and outer  
473 hair cells were mechanically stimulated using a fluid-jet device (Kros et al., 1992; Géléoc et  
474 al., 1997; Johnson et al., 2011). Pipettes were pulled from borosilicate glass (TW150-F,  
475 World Precision Instruments); their tip diameter was adjusted within a range of 5–10 μm.  
476 Fluid flow through a pipette was driven by a voltage command to a piezoelectric disk (Murata  
477 7BB-27-4). Any steady-state flow coming in or out of the pipette was nulled by changing the  
478 hydrodynamic pressure inside the fluid-jet pipette; the hydrodynamic pressure was adjusted  
479 with a syringe connected to the body of the fluid-jet device. The fluid-jet pipette was  
480 positioned on the abneural side of the bundle along the hair bundle's axis of mirror symmetry  
481 (Fig. 1C). Fluid coming out the pipette thus deflected the hair bundles towards the shortest  
482 stereociliary row, closing the ion channels that mediate mechano-electrical transduction. This  
483 direction of bundle movement is defined as the negative direction in this paper; conversely,  
484 positive movements were directed towards the tallest row of stereocilia, fostering opening of  
485 the transduction channels. Mechanical stimuli were applied as 100-ms paired-pulse steps  
486 (Fig. 2 and Figure 2–figure supplement 3), or 60-Hz sinusoids (Fig. 4) with the magnitude of  
487 driving voltages varying between 0 and 60 V.

488 For stiffness measurements, we measured hair-bundle movements evoked by 100-ms force  
489 steps (Fig. 2; see the force-calibration procedure below). We observed that the hair bundle  
490 responded to a force step with a fast deflection in the direction of the stimulus followed by a  
491 slower movement in the same direction; this mechanical creep was strongly reduced upon tip-  
492 link disruption by EDTA treatment (Figure 2–figure supplement 4). Over the duration of the  
493 step, the deflection of the hair bundle increased by 12–22% in the direction of the applied

494 step. The bundle displacement was measured 5–10 ms after the onset of the step stimulus; the  
495 stiffness was given by the slope of the relation between the force (noted  $F$  in the following)  
496 and the displacement of the bundle's tip. These measurements were performed in standard  
497 saline.

498 **Applying and measuring forces with the fluid jet.** We describe here how we calibrated the  
499 hydrodynamic drag force  $F$  applied to the hair bundle by a fluid jet by using a flexible glass  
500 fiber of known stiffness as a reference. The method is based on a published procedure  
501 (Géléoc et al., 1997) that we refined to account for the non-uniform velocity field of the fluid  
502 (Figure 2–figure supplement 1). Using a generalized Stokes equation (Leith, 1987), the drag  
503 force can be written as  $F = 6\pi\eta R_{\text{HB}} U$ , in which  $\eta$  is the viscosity of the surrounding fluid  
504 and  $R_{\text{HB}}$  is the effective hydrodynamic radius of the bundle. The effective radius  $R_{\text{HB}}$  was  
505 approximated by that of a prolate ellipsoid of short axis  $h$  and long axis  $W$ , which correspond  
506 to the bundle's height and width, respectively. For a fluid flow perpendicular to the axis of  
507 rotational symmetry of the ellipsoid, this yields:

$$508 \quad R_{\text{HB}} \cong 4h / \left\{ 3 \left[ \phi / (\phi^2 - 1) + \left( (2\phi^2 - 3) \ln(\phi + \sqrt{\phi^2 - 1}) \right) / (\phi^2 - 1)^{3/2} \right] \right\}, \quad (1)$$

509 in which  $\phi = W/h$  represents the aspect ratio of the ellipsoid (Happel and Brenner, 2012).  
510 Figure 3–table supplement 1 and Figure 3–figure supplement 2 recapitulate the values of  
511 parameters  $h$  and  $W$  that we used to model inner and outer hair-cell bundles along the  
512 tonotopic axis of the rat cochlea, as well as the resulting values of  $R_{\text{HB}}$ . The effective velocity  
513  $U \cong \int_{-W/2}^{W/2} v_X(x, y) dy / W$  was estimated by computing the mean of the velocity field  
514  $v_X(x, y)$  of the fluid over the width  $W$  of the hair bundle. Here,  $v_X(x, y) = \vec{v} \cdot \vec{e}_X$  is the  
515 projection of the fluid velocity  $\vec{v}$  on the axis of mechanosensitivity (axis  $X$ ) of the hair bundle;  
516 its value is estimated along the axis ( $Y$ ) perpendicular to axis  $X$  for a bundle positioned at a  
517 distance  $x$  from the mouth of the fluid-jet pipette (Figure 2–figure supplement 1A). Using  
518 bead tracers, we found that the velocity profile  $v_X(x, y)$  obeyed (Schlichting, 1933)

$$519 \quad v_X(x, y) = V_{\text{max}}(x) / (1 + (y/A(x))^2)^2, \quad (2)$$

520 where  $V_{\text{max}}(x)$  and  $A(x)$  characterize, respectively, the maximal speed and the lateral  
521 extension of the velocity field at position  $x$  (Figure 2–Figure supplement 1B–D). By  
522 integrating the velocity profile, we obtain an expression for the force

$$523 \quad F = 6\pi\eta R_{\text{HB}} \beta_{\text{HB}} V_{\text{max}} \quad , \quad (3)$$

524 where  $\beta_{\text{HB}} = \beta(w) = \frac{1}{2w} (w/(1+w^2) + \tan^{-1} w)$  is a constant that depends on the  
525 normalized width of the hair bundle  $w = W/(2A)$ . Thus, calibrating the force  $F$  is equivalent  
526 to calibrating the maximal fluid velocity  $V_{\text{max}}$ .

527 To estimate  $V_{\text{max}}$ , we measured the force  $\bar{F} \cong 6\pi\eta R_{\text{F}} \bar{U}$  applied by the same jet on a  
528 calibrated glass fiber, whose longitudinal axis was oriented perpendicularly to that of the  
529 fluid-jet pipette. Given the diameter  $D_{\text{F}}$  of the fiber, the effective hydrodynamic radius of a  
530 cylindrical fiber was calculated as  $R_{\text{F}} = 2L/[3(\ln(L/D_{\text{F}}) + 0.84)]$  (Tirado and Torre, 1979).  
531 Because the conical fluid jet intersected the fiber over a length  $L > W$ , the effective fluid  
532 velocity  $\bar{U} \cong \int_{-L/2}^{+L/2} v_x(x, y) dy/L = \beta_{\text{F}} V_{\text{max}}$  for the fiber was smaller than the effective  
533 velocity  $U$  for the hair bundle, where  $\beta_{\text{F}} = \beta(L/(2A)) < \beta_{\text{HB}}$ . In practice, we used  $L(x) =$   
534  $2x \tan \alpha + D_{\text{FJ}}$ , where  $\alpha$  is the half-aperture of the conical fluid jet that was visualized using  
535 a dye (Coomassie Brilliant Blue; Figure 2–figure supplement 2) and  $D_{\text{FJ}}$  is the diameter of the  
536 mouth of the fluid-jet pipette. We noticed that  $L(x) \cong 2A(x)$  (Figure 2–figure supplement 1;  
537 figure supplement 2). We used this property to estimate  $\beta_{\text{HB}} \cong \beta(W/L)$  and  $\beta_{\text{F}} \cong \beta(1)$   
538 without having to measure  $A$  directly in every experiment.

539 In experiments, the projected horizontal distance between the tip of the fluid-jet  
540 pipette and the hair bundle or the fiber was fixed at  $x = 7.8 \pm 0.3 \mu\text{m}$ . Flexible fibers of  
541 diameters  $D_{\text{F}} = 0.7\text{--}1.5 \mu\text{m}$  and stiffness  $k_{\text{F}} = 0.2\text{--}2 \text{ mN/m}$  were fabricated and calibrated as  
542 described before (Bormuth et al., 2014); their effective hydrodynamic radii varied within a  
543 range of  $R_{\text{F}} = 2.5\text{--}3.2 \mu\text{m}$ . A fluid jet of given magnitude elicited a force  $\bar{F} = k_{\text{F}} \Delta X$ , where  
544  $\Delta X$  is the measured deflection of the fiber. The relation between the force  $\bar{F}$  applied to a fiber  
545 and the voltage command to the fluid-jet device was linear; its slope provided the calibration  
546 constant  $C$  (Figure 2–figure supplement 3). When stimulating a hair bundle, a voltage  
547 command  $V_{\text{C}}$  to the fluid-jet device thus elicited a force  $F \cong GC V_{\text{C}}$ , where  $G = F/\bar{F} =$   
548  $(\beta_{\text{HB}} R_{\text{HB}})/(\beta_{\text{F}} R_{\text{F}})$ . We used  $G = 1.4 \pm 0.1$  (mean  $\pm$  SD; range: 1.27–1.65) for inner hair cells  
549 and  $G = 1.3 \pm 0.1$  (mean  $\pm$  SD; range: 1.12–1.47) for outer hair cells. Thus, we estimate that  
550 the force applied on the hair bundle was 30–40% higher than that measured on the calibration  
551 fiber using the same jet of fluid. In practice, we calculated  $G$  in each experiment from the  
552 geometrical parameters of the fluid-jet pipette, the calibration fiber, and the hair bundle. We  
553 noticed that  $L(x) \cong 2A(x)$ ; at a distance  $y = L/2$  from the center of the fluid jet ( $y = 0$ ), the  
554 fluid velocity is expected to be 25% of the maximal value. Thus, some of the moving fluid  
555 was not taken into account in our estimates of the force acting on the fiber, resulting in an

556 underestimation. However, taking  $L(x) = 4A(x)$  resulted in an increase of  $G$  by only 5%  
557 while the fluid velocity dropped to 4% of the maximal value at the edge of the fluid cone (in  
558  $y = L/2 = 2A$ ).

559 **Electrophysiological recordings.** We used the patch-clamp technique to measure mechano-  
560 electrical transduction currents. Borosilicate patch pipettes were filled with an intracellular  
561 solution containing 142 mM CsCl, 3.5 mM MgCl<sub>2</sub>, 1 mM EGTA, 5 mM Na<sub>2</sub>-ATP, 0.5 mM  
562 Na<sub>2</sub>-GTP and 10 mM HEPES (pH=7.3, 295 mOsmol/kg). When immersed in standard saline,  
563 these pipettes had a resistance of 1.5–3 MΩ. A patch pipette was inserted in the organ of  
564 Corti through a pre-formed hole in the reticular lamina and approached parallel to the hair cell  
565 rows towards the soma of a target hair cell. During the approach, standard saline was  
566 abundantly perfused to protect the Ca<sup>2+</sup>-sensitive tip-links from EGTA. Hair cells were  
567 whole-cell voltage clamped at a holding potential of –80 mV; transduction currents were low-  
568 pass filtered at 1-10 kHz (Axopatch 200B; Axon Instruments). No correction was made for  
569 the liquid-junction potential. The series resistance was always below 10 MΩ and was  
570 compensated up to 70%. To disrupt the tip links with EDTA iontophoresis, the solution  
571 bathing the cells was changed to low-Ca<sup>2+</sup> saline after the cell was patched; the solution  
572 change was performed either with a perfusion or with a Picospritzer (Picospritzer III, Parker).

573 **Scanning electron microscopy.** Cochleae from P8 rats were processed with osmium  
574 tetroxide/thiocarbohydrazide, as previously described (Furness et al., 2008). Samples were  
575 analysed by field emission scanning electron microscopy operated at 5 kV (Jeol JSM6700F).  
576 The number of stereocilia in inner and outer hair-cell bundles was estimated from electron  
577 micrographs at each of the cochlear locations where we performed mechanical and  
578 electrophysiological measurements (Figure 3–figure supplement 2; table supplement 1).

579 **Estimating the number of intact tip links in a hair bundle.** We performed patch-clamp  
580 recordings of the transduction current  $I_{MAX}$  elicited at saturation by large hair-bundle  
581 deflections (Figure 3–supplement figure 3). In inner hair cells, the number of intact tip links  
582  $N_{TL} = I_{MAX}/I_1$  was calculated by dividing the saturated current  $I_{MAX}$  for the whole hair  
583 bundle by the published estimate  $I_1 = 35.4$  pA for the transduction current flowing through  
584 the tip of a single transducing stereocilium (Beurg et al., 2009); electron microscopy has  
585 indeed shown that there is precisely one tip link per stereocilium in an intact hair bundle  
586 (Pickles et al., 1984; Kachar et al., 2000). We used the same value of  $I_1$  at all cochlear  
587 locations (Beurg et al., 2006; Beurg et al., 2018). Given the magnitude  $i = 15$  pA of the  
588 current flowing through a single transduction channel, there was on average  $I_1/i = 2.36$

589 transduction channels per transducing stereocilium (Beurg et al., 2006). In outer hair cells,  
590 there is no direct estimate of  $I_1$ . However, the unitary current  $i$  was shown to increase (Beurg  
591 et al., 2006; Beurg et al., 2015; Beurg et al., 2018) from 8.3 pA to 12.1 pA when the hair  
592 cell's characteristic frequency increases from 4 kHz to 14 kHz (Beurg et al., 2006). All these  
593 currents were measured under the same experimental conditions as ours, in particular using a  
594  $-80$  mV holding potential and with the hair cells immersed in a standard saline containing  
595  $1.5$  mM  $\text{Ca}^{2+}$ . Assuming a linear relation between the unitary current and the position of the  
596 hair cell along the tonotopic axis of the cochlea (Beurg et al., 2015; Beurg et al., 2018), we  
597 inferred the unitary currents at other cochlear locations. We then assumed that the average  
598 number of transduction channels per tip link was 2.36, as estimated in inner hair cells (Beurg  
599 et al., 2009). The number of intact tip links was then calculated as  $I_{\text{MAX}}/(2.36 i)$ . We  
600 performed this measurement for 10 hair cells at each cochlear location, both for inner and  
601 outer hair cells, to calculate the average number of intact tip links in any given hair cell. In  
602 these experiments, the hair cells were immersed in standard saline.

603 Recent measurements in the mouse cochlea have revealed that unitary currents may  
604 represent an ensemble average over multiple conductance states, raising the possibility that  
605 these currents are produced by a few (up to 5) identical transduction channels that gate  
606 cooperatively (Beurg et al., 2018). This finding does not affect our estimates, because the  
607 current that flows through a single stereocilium stays the same, whether or not it results from  
608 cooperative gating of multiple channels or from gating of an effective channel endowed with  
609 the same conductance as the total conductance of the group.

610 **Signal Generation and Acquisition.** All signals were generated and acquired under the  
611 control of a computer running a user interface programmed with LabVIEW software (version  
612 2011, National Instruments). Command signals were produced by a 16-bit interface card at a  
613 sampling rate of 25 kHz (PCI-6733, National Instruments). A second interface card (PCI-  
614 6250, National Instruments) conducted signal acquisition with a precision of 16 bits.  
615 Sampling rates for signal generation and acquisition varied within the range 2.5–25 kHz. All  
616 signals were conditioned with an eight-pole Bessel antialiasing filter adjusted to a low-pass  
617 half-power frequency at half the sampling rate of signal acquisition.

618 **Statistical significance.** All results are quoted as mean  $\pm$  standard error of the mean ( $n$ ) with  
619 a number  $n$  of cells of at least 10 per group. G-Power analysis ensured that this number was  
620 sufficient to achieve a signal-to-noise ratio of 1–1.5, with 80% power at a 5% significance  
621 level. We performed a one-way ANOVA to assay statistical significance of the measured

622 mean-value variation of a given property, *e.g.* the hair-bundle stiffness, between the different  
623 cochlear locations for inner (IHC) or outer (OHC) hair cells. We also used two-tailed  
624 unpaired Student's *t*-tests with Welch's correction when comparing mean values between two  
625 groups of a given hair-cell type (IHC or OHC) with different characteristic frequencies or  
626 between the two cell types (IHC/OHC) with a given characteristic frequency. Stars  
627 correspond to *p*-values with \**p* < 0.05, \*\**p* < 0.01, and \*\*\**p* < 0.001, whereas 'n.s.'  
628 (*p* > 0.05) indicates non-significant differences. To determine whether variables estimated  
629 from the product of *M* independent variables  $X_i$  ( $i = 1 \dots M$ ) had means that were statistically  
630 different, we first calculated the standard error of the mean  $\sigma_{\prod X_i}$  of the product and the  
631 effective number of degrees of freedom  $\nu_{\text{eff}}$  of the product. Defining  $\bar{X}_i$  as the mean value of  
632 the variable  $X_i$  over  $n_i$  measurements,  $s_i$  the standard deviation and  $\sigma_i = s_i/\sqrt{n_i}$  the standard  
633 error of the mean, the standard error of the mean for the product was calculated as  $\sigma_{\prod X_i} =$   
634  $\prod \bar{X}_i \sqrt{\sum \left(\frac{\sigma_i}{\bar{X}_i}\right)^2}$  and the effective number of degrees of freedom associated with the product  
635 was calculated using the Welch-Satterthwaite approximation as  $\nu_{\text{eff}} =$   
636  $[\sigma_{\prod X_i}/\prod \bar{X}_i]^4 / \sum \frac{1}{n_i-1} \left(\frac{\sigma_i}{\bar{X}_i}\right)^4$ . Finally, we characterized tonotopic gradients by performing  
637 weighted linear regressions, in which the weight applied to each data point was given by the  
638 inverse of the squared standard error of the mean. We then applied a *t*-test on the resulting  
639 coefficients to determine whether the observed difference between the gradients measured  
640 with inner and outer hair cells was statistically significant. The results of all statistical  
641 analyses are listed in tables associated to the main figures.

642

### 643 **Acknowledgements:**

644 We thank Benoît Lemaire and Rémy Fert from the machine shop of the Curie Institute,  
645 Jérémie Barral for a critical reading of the manuscript and Christine Petit for fruitful  
646 discussions. This research was supported by the French National Agency for Research  
647 (ANR-11-BSV5 0011 and ANR-16-CE13-0015) and by the Labex Celtisphybio ANR-10-  
648 LABX-0038 part of the Idex PSL. M.T. is alumnus of the Frontiers in Life Science PhD  
649 program of Université Paris Diderot and thanks the Fondation Agir pour l'Audition for a  
650 doctoral fellowship.

651



652 **FIGURES AND FIGURE LEGENDS**

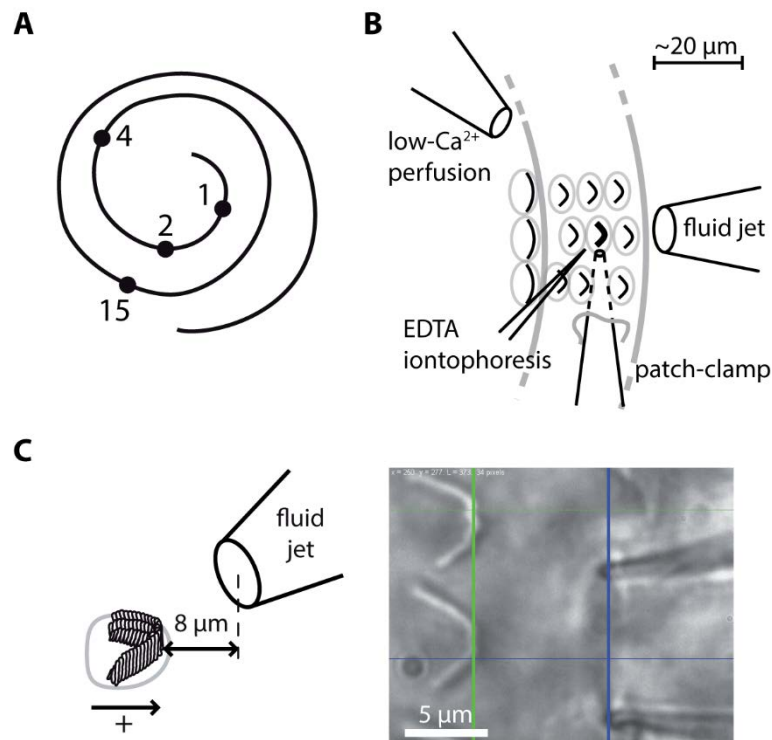

653

654

655 **Figure 1: Hair-bundle stimulation along the tonotopic axis of the rat cochlea.**

656 (A) Schematic representation of the tonotopic axis of the rat cochlea. Recordings were made  
657 at locations marked by black disks, corresponding to characteristic frequencies (in kHz)  
658 increasing from the apex to the base of the cochlea as indicated on the figure and to fractional  
659 distances from the apex of 5%, 10%, 20%, and 50%. The rat cochlea was typically 10 mm  
660 long. Adapted from (Viberg and Canlon, 2004). (B) Schematic layout of the experimental  
661 pipettes around a given outer hair cell. We combined fluid-jet stimulation of single hair  
662 bundles, iontophoresis of a Ca<sup>2+</sup> chelator (EDTA), patch-clamp recordings of transduction  
663 currents, and perfusion of low-Ca<sup>2+</sup> saline. (C) Schematic representation of the fluid-jet  
664 pipette and of a hair bundle (left) and micrograph of a fluid-jet pipette ready to stimulate an  
665 outer hair cell of the rat cochlea (right). A positive (negative) deflection of the hair bundle, as  
666 defined on the drawing, was elicited by fluid suction (ejection) into (from) the pipette,  
667 promoting opening (closure) of the transduction channels. The horizontal projected distance  
668 between the mouth of the pipette (blue vertical line) and the hair bundle (green vertical line)  
669 was set at 8 μm.

670



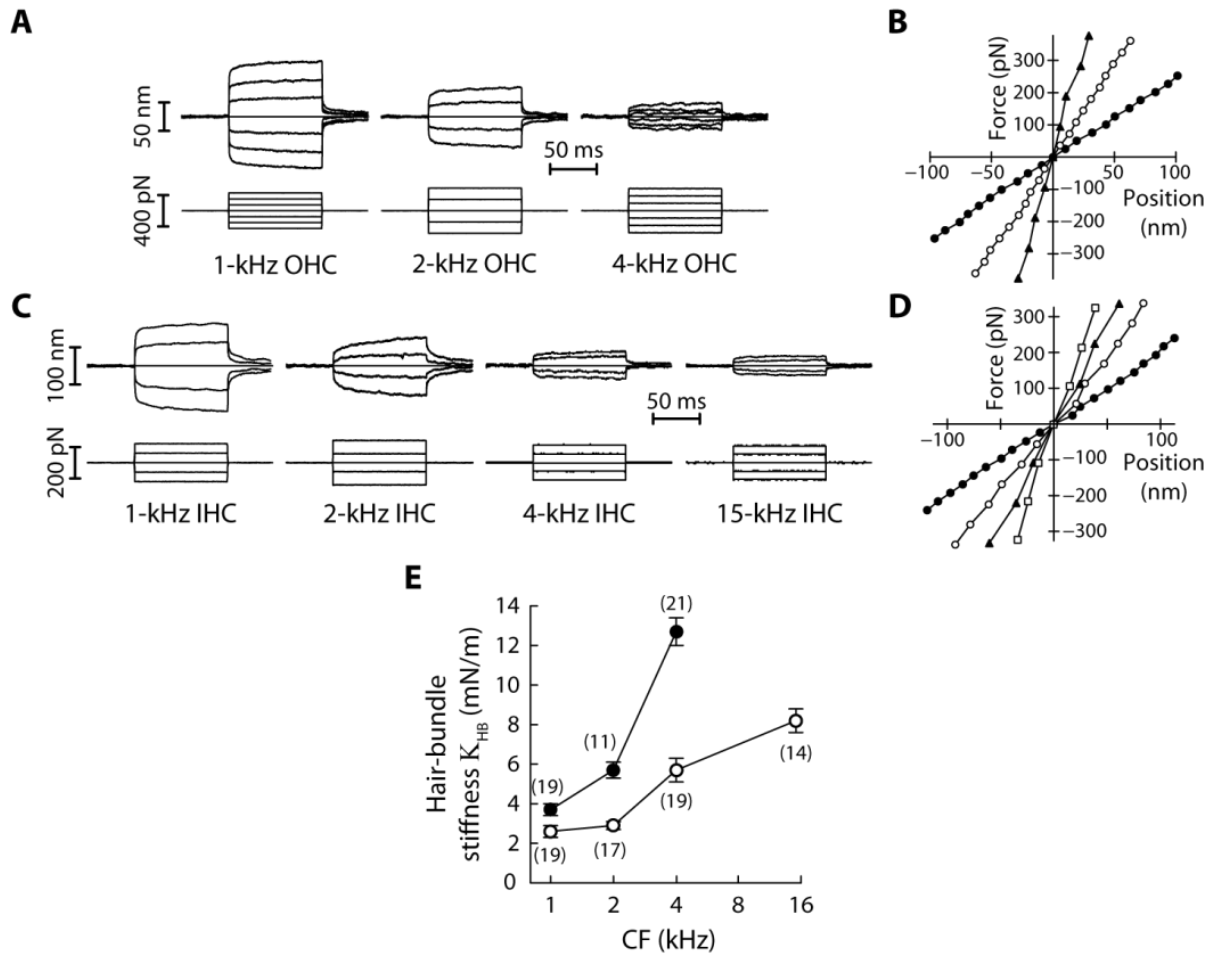

671

672 **FIGURE 2: Stiffness gradients of the hair bundle.**

673 **(A)** Hair-bundle movements (top) in response to series of force steps (bottom) for outer hair  
 674 cells (OHC) with characteristic frequencies of 1, 2 and 4 kHz (from left to right). **(B)** Force-  
 675 displacement relations for the data shown in **A**, with black disks, white disks and black  
 676 triangles corresponding to characteristic frequencies of 1, 2 and 4 kHz, respectively. **(C)**  
 677 Hair-bundle movements (top) in response to series of force steps (bottom) for inner hair cells  
 678 (IHC) with characteristic frequencies of 1, 2, 4, and 15 kHz. **(D)** Force-displacement  
 679 relations for the data shown in **C**, with black disks, white disks, black triangles, and white  
 680 squares corresponding to characteristic frequencies of 1, 2, 4, and 15 kHz, respectively. **(E)**  
 681 Stiffness ( $K_{HB}$ ) of a hair bundle under control conditions as a function of the characteristic  
 682 frequency (CF) for inner (white disks) and outer (black disks) hair cells. Each data point in **E**  
 683 is the mean  $\pm$  standard error of the mean (SEM) with the number of cells indicated between  
 684 brackets.

685 The following figure and table supplements are available for figure 2:

686 **Figure supplement 1.** Velocity field of a fluid jet.

687 **Figure supplement 2.** Geometrical characteristics of a fluid jet.

688 **Figure supplement 3.** Rise time and linearity of the fluid-jet stimulus.

689 **Figure Supplement 4.** Mechanical creep during a force step.

690 **Table supplement 1.** Statistical significance.

691

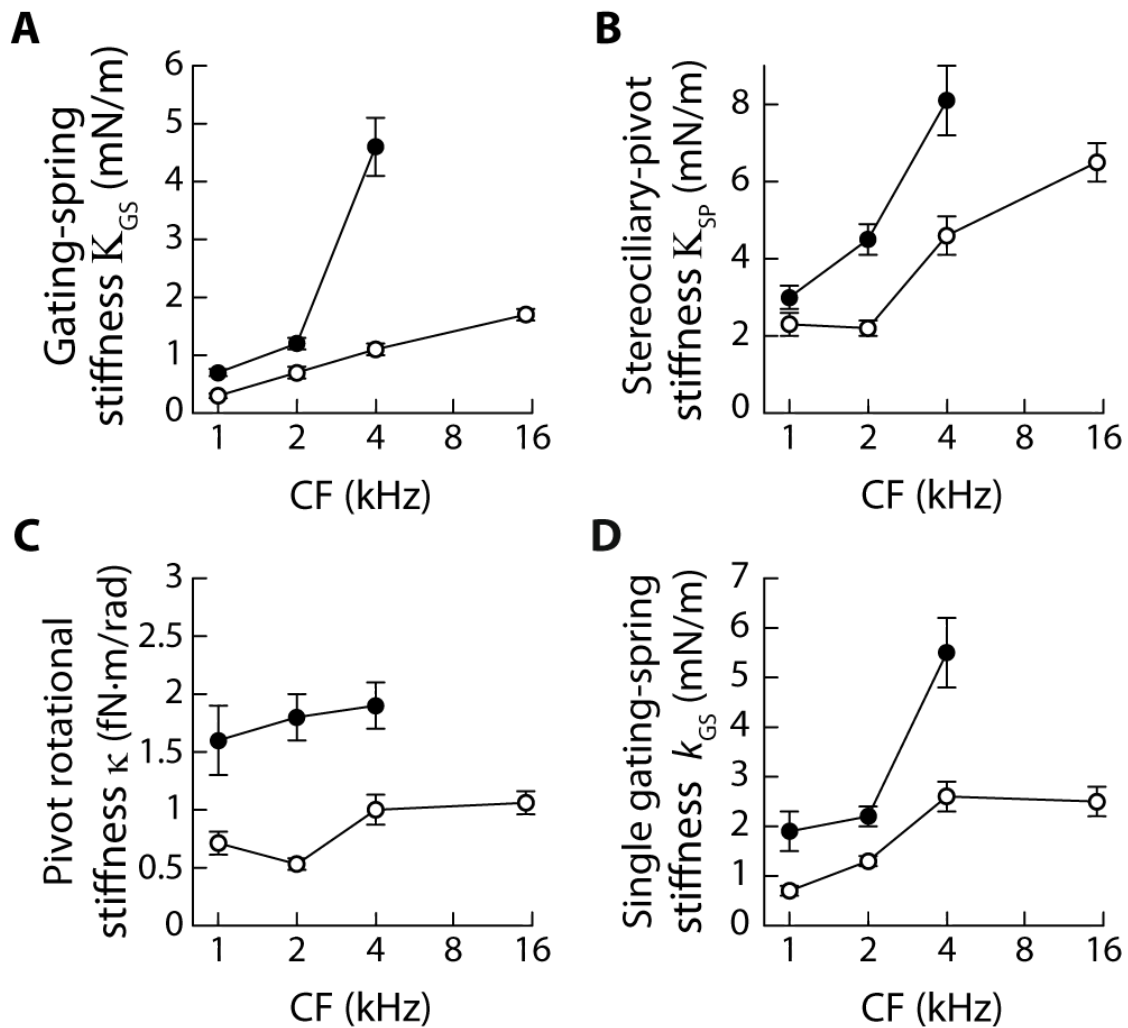

692

693 **FIGURE 3: Stiffness gradients of the gating springs and of the stereociliary pivots.**

694 Stiffness (A) of the contribution of the gating springs ( $K_{GS} = r K_{HB}$ ), (B) of a hair bundle  
 695 after tip-link disruption, corresponding to the contribution of the stereociliary pivots ( $K_{SP} =$   
 696  $(1 - r) K_{HB}$ ), (C) of a single stereociliary pivot ( $\kappa = K_{SP} h^2 / N_{SP}$ ), and (D) of a single gating  
 697 spring ( $k_{GS} = K_{GS} \gamma^2 / N_{TL}$ ) as a function of the characteristic frequency (CF) for inner (white  
 698 disks) and outer (black disks) hair cells. These stiffnesses were calculated from measured  
 699 values of the hair-bundle stiffness  $K_{HB}$  (Fig. 2), the amplitude ratio  $1 - r$  of hair-bundle  
 700 movements before and after tip-link disruption (Figure 3-figure supplement 1), the hair-  
 701 bundle height  $h$  and the number of stereocilia  $N_{SP}$  (Figure 3-figure supplement 2), and the  
 702 average number  $N_{TL}$  of intact tip links (Figure 3-figure supplement 3). Each data point is the  
 703 mean  $\pm$  SEM; SEMs were calculated as described in the Methods.

704 The following figure and table supplements are available for figure 3:

705 **Figure supplement 1.** Gating-spring contribution to the hair-bundle stiffness.

706 **Figure supplement 2.** Hair-bundle morphology along the tonotopic axis.

707 **Figure supplement 3.** Transduction currents and number of intact tip links along the  
708 tonotopic axis.

709 **Table supplement 1.** Morphological parameters of inner and outer hair-cell bundles.

710 **Table supplement 2.** Statistical significance.

711

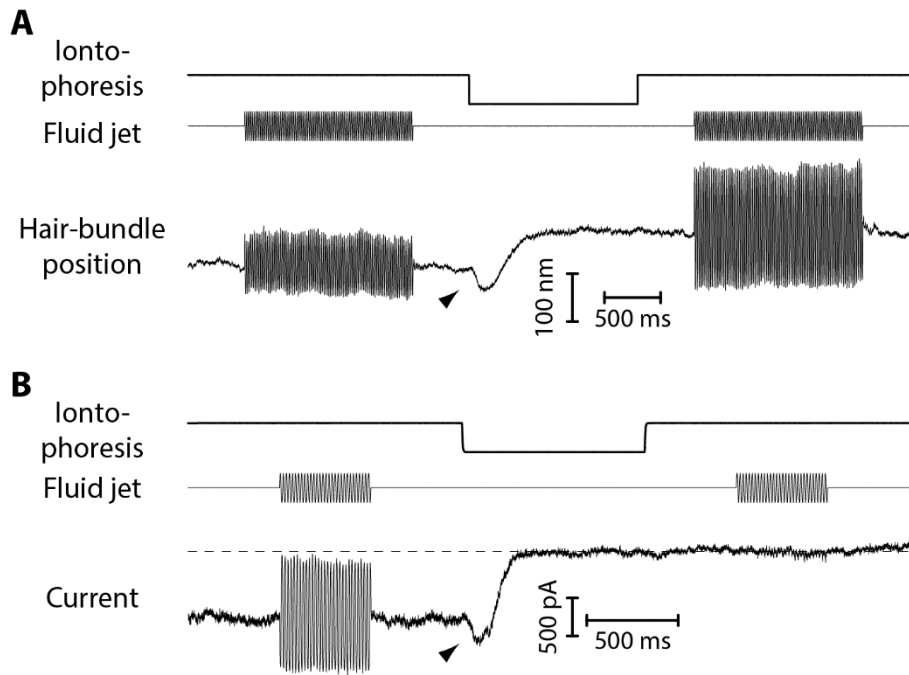

712

713

714 **FIGURE 4: Mechanical and electrical response of a hair bundle to fluid-jet stimulation**  
715 **and fast calcium chelation.**

716 (A) An iontophoretic step of a calcium chelator (EDTA; top) elicited a biphasic movement of  
717 the hair bundle from an inner hair cell (bottom): the hair bundle first moved in the negative  
718 direction (arrow head) and then in the positive direction. After iontophoresis, the position  
719 baseline was offset by  $\Delta X_R = +78$  nm with respect to the resting position at the start of the  
720 experiment. A sinusoidal command to a fluid jet (middle) evoked hair-bundle movements  
721 (bottom) that increased in magnitude, here by 50%, after application of the iontophoretic step.  
722 Repeating the iontophoretic step elicited no further movement and the response to fluid-jet  
723 stimulation remained of the same magnitude. A similar behaviour was observed with 101  
724 inner and 44 outer hair cells. (B) An iontophoretic step of EDTA (top) also elicited biphasic  
725 variations of the transduction current: the inward current first increased (arrow head) and then  
726 decreased. Before application of the calcium chelator, fluid-jet stimulation evoked a  
727 transduction current of 1.5-nA peak-to-peak magnitude; the open probability of the  
728 transduction channels was near  $\frac{1}{2}$ . The transduction current was abolished by the  
729 iontophoretic step. Outer hair cell at the 4-kHz location; the same behaviour was observed  
730 with 17 outer hair cells. In A-B, the command signal to the fluid-jet device was a 60-Hz  
731 sinusoid and we applied a -100-nA iontophoretic step on top of a +10-nA holding current.  
732 The hair bundles were exposed to 20- $\mu$ M  $\text{Ca}^{2+}$ . In B, the dashed line indicates the current for  
733 which the transduction channels are all closed.

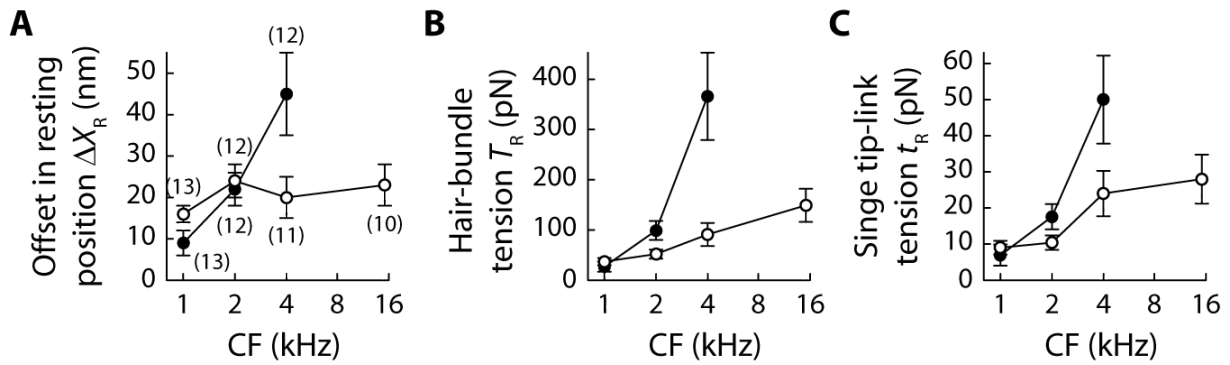

734

735 **FIGURE 5: Gradients in tip-link tension at rest.**

736 Offset  $\Delta X_R$  in the resting position of a hair bundle resulting from tension release in the tip  
 737 links (A), tip-link tension  $T_R = K_{SP} \Delta X_R$  in the hair bundle (B) and tension  $t_R = T_R/(\gamma N_{TL})$   
 738 along the oblique axis of a single tip link (C) as a function of the characteristic frequency  
 739 (CF) for inner (white disks) and outer (black disks) hair cells. The hair-bundle tension  $T_R$  (B)  
 740 was calculated as the product of the stereociliary-pivot stiffness  $K_{SP}$  shown in Fig. 3B and the  
 741 data shown in A; this tension is estimated along the bundle's horizontal axis of mirror  
 742 symmetry. The single tip-link tension  $t_R$  was then deduced from the projection factor  $\gamma$  and  
 743 the average number  $N_{TL}$  of intact tip links in a hair bundle (Figure 3-figure supplement 2).  
 744 Each data point in A is the mean  $\pm$  SEM with the number of cells indicated between brackets;  
 745 in B-C, mean values and SEMs were calculated as described in the Methods.

746 The following table supplement is available for figure 5:

747 **Table supplement 1.** Statistical significance.

748

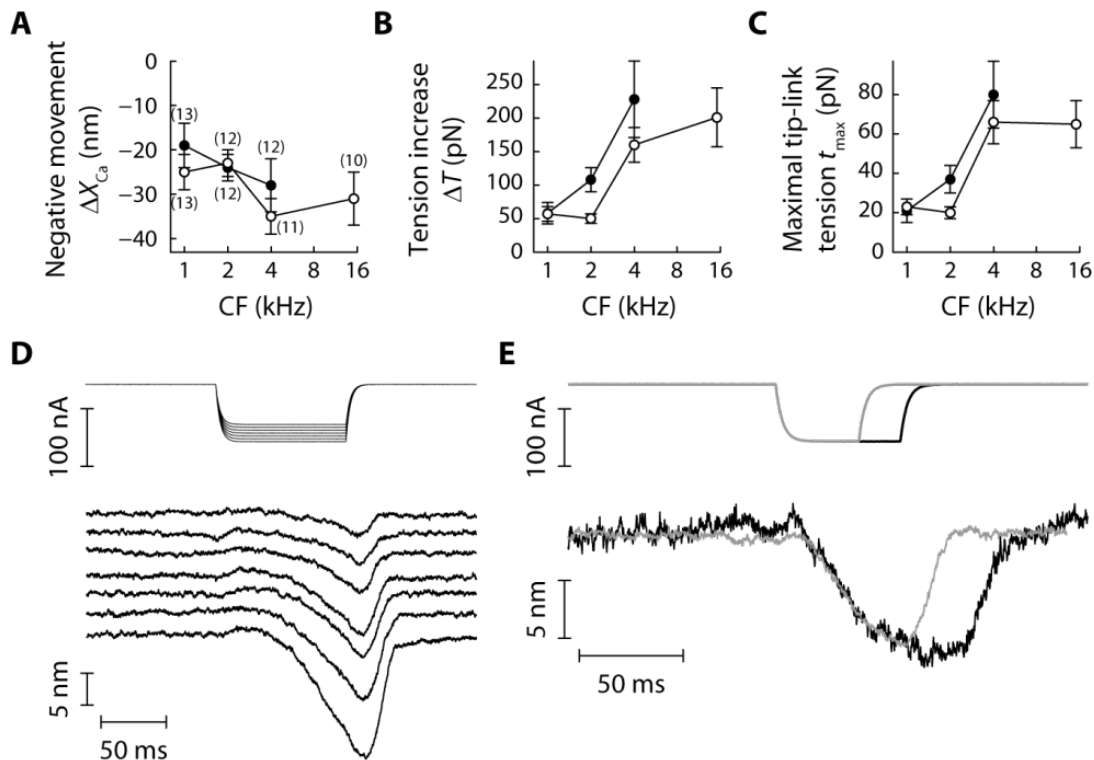

749

750 **FIGURE 6: Tensioning of the tip links at decreased  $Ca^{2+}$  concentrations.**

751 The amplitude of the negative hair-bundle movement  $\Delta X_{Ca}$  (A), of the maximal increase  
752  $\Delta T = -K_{SP} \Delta X_{Ca}$  in hair-bundle tension (B), and of the maximal tension  $t_{max} = t_R +$   
753  $\Delta T / (\gamma N_{TL})$  in a single tip link (C) are plotted as a function of the hair cell's characteristic  
754 frequency (CF). The tension increase in B was calculated from the stiffness  $K_{SP}$  of the  
755 stereociliary pivots (Fig. 3B) and the data shown in A. The single tip-link tension  $t_{max}$  was  
756 then deduced from the tension at rest  $t_R$  in a single tip link (Fig. 5C), the projection factor  $\gamma$   
757 (Figure 3-figure supplement 2) and the average number  $N_{TL}$  of intact tip links (Figure 3-  
758 figure supplement 3). (D) Current-step commands (top) applied to an iontophoretic pipette  
759 containing the  $Ca^{2+}$  chelator EDTA evoked reversible negative movements of the hair bundle  
760 (bottom). (E) When the stimulus (top) was long enough, the hair bundle position could  
761 reach a steady state (bottom), corresponding to higher resting tension in the tip links. In A-C,  
762 the hair bundles were immersed in low- $Ca^{2+}$  saline, for which EDTA iontophoresis led to tip-  
763 link disruption. Positions and tensions were estimated at the point of polarity reversal of the  
764 hair-bundle movement (see Fig. 4A), thus at the initiation of tip-link disruption, where the  
765 hair bundle reached its largest deflection in the negative direction and tension was thus  
766 maximal. Black and white disks correspond to outer and inner hair cells, respectively. The  
767 error bars in A represent  $\pm$ SEM with numbers of cells indicated between brackets; in B-C,  
768 mean values and SEMs were calculated as described in the Methods. In D-E, the hair bundles



769 were immersed in a saline containing 500- $\mu$ M  $\text{Ca}^{2+}$ ; this higher  $\text{Ca}^{2+}$  concentration preserved  
770 the integrity of the tip links upon EDTA iontophoresis.

771 The following table supplement is available for figure 6:

772 **Table supplement 1.** Statistical significance.

773

774 **REFERENCES**

- 775 Araya-Secchi R, Neel BL, Sotomayor M (2016) An elastic element in the protocadherin-15 tip  
776 link of the inner ear. *Nature communications* 7:13458.
- 777 Assad JA, Shepherd GM, Corey DP (1991) Tip-link integrity and mechanical transduction in  
778 vertebrate hair cells. *Neuron* 7:985-994.
- 779 Barral J, Jülicher F, Martin P (2018) Friction from Transduction Channels' Gating Affects  
780 Spontaneous Hair-Bundle Oscillations. *Biophysical journal* 114:425-436.
- 781 Bartsch TF, Hudspeth A (2018) A New Twist on Tip Links. *Neuron* 99:423-425.
- 782 Beurg M, Tan X, Fettiplace R (2013) A prestin motor in chicken auditory hair cells: active  
783 force generation in a nonmammalian species. *Neuron* 79:69-81.
- 784 Beurg M, Evans MG, Hackney CM, Fettiplace R (2006) A large-conductance calcium-selective  
785 mechanotransducer channel in mammalian cochlear hair cells. *J Neurosci* 26:10992-  
786 11000.
- 787 Beurg M, Nam JH, Crawford A, Fettiplace R (2008) The actions of calcium on hair bundle  
788 mechanics in mammalian cochlear hair cells. *Biophys J* 94:2639-2653.
- 789 Beurg M, Fettiplace R, Nam JH, Ricci AJ (2009) Localization of inner hair cell  
790 mechanotransducer channels using high-speed calcium imaging. *Nat Neurosci* 12:553-  
791 558.
- 792 Beurg M, Xiong W, Zhao B, Muller U, Fettiplace R (2015) Subunit determination of the  
793 conductance of hair-cell mechanotransducer channels. *Proc Natl Acad Sci U S A*  
794 112:1589-1594.
- 795 Beurg M, Cui R, Goldring AC, Ebrahim S, Fettiplace R, Kachar B (2018) Variable number of  
796 TMC1-dependent mechanotransducer channels underlie tonotopic conductance  
797 gradients in the cochlea. *Nat Commun* 9:2185.
- 798 Bormuth V, Barral J, Joanny J-F, Juelicher F, Martin P (2014) Transduction channels' gating  
799 can control friction on vibrating hair-cell bundles in the ear. *Proc Natl Acad Sci U S A*  
800 111:7185-7190.
- 801 Bosher SK, Warren RL (1978) Very low calcium content of cochlear endolymph, an  
802 extracellular fluid. *Nature* 273:377-378.
- 803 Bustamante C, Marko JF, Siggia ED, Smith S (1994) Entropic elasticity of lambda-phage DNA.  
804 *Science* 265:1599-1599.

- 805 Cheung EL, Corey DP (2006) Ca<sup>2+</sup> changes the force sensitivity of the hair-cell transduction  
806 channel. *Biophysical journal* 90:124-139.
- 807 Corey DP, Hudspeth AJ (1983) Kinetics of the receptor current in bullfrog saccular hair cells. *J*  
808 *Neurosci* 3:962-976.
- 809 Corns LF, Johnson SL, Kros CJ, Marcotti W (2014) Calcium entry into stereocilia drives  
810 adaptation of the mechano-electrical transducer current of mammalian cochlear hair  
811 cells. *Proc Natl Acad Sci U S A* 111:14918-14923.
- 812 Eatock RA (2000) Adaptation in hair cells. *Annu Rev Neurosci* 23:285-314.
- 813 Effertz T, Becker L, Peng AW, Ricci AJ (2017) Phosphoinositol-4,5-bisphosphate regulates  
814 auditory hair cell mechanotransduction channel pore properties and fast adaptation. *J*  
815 *Neurosci*.
- 816 Fettiplace R, Fuchs PA (1999) Mechanisms of hair cell tuning. *Annu Rev Physiol* 61:809-834.
- 817 Fettiplace R, Hackney CM (2006) The sensory and motor roles of auditory hair cells. *Nat Rev*  
818 *Neurosci* 7:19-29.
- 819 Fettiplace R, Kim KX (2014) The physiology of mechano-electrical transduction channels in  
820 hearing. *Physiological reviews* 94:951-986.
- 821 Flock A, Strelhoff D (1984) Graded and nonlinear mechanical properties of sensory hairs in  
822 the mammalian hearing organ. *Nature* 310:597-599.
- 823 Freeman DM, Weiss TF (1990) Hydrodynamic analysis of a two-dimensional model for  
824 micromechanical resonance of free-standing hair bundles. *Hearing research* 48:37-67.
- 825 Frishkopf LS, DeRosier DJ (1983) Mechanical tuning of free-standing stereociliary bundles  
826 and frequency analysis in the alligator lizard cochlea. *Hearing research* 12:393-404.
- 827 Furness D, Katori Y, Kumar BN, Hackney C (2008) The dimensions and structural attachments  
828 of tip links in mammalian cochlear hair cells and the effects of exposure to different  
829 levels of extracellular calcium. *Neuroscience* 154:10-21.
- 830 Ge J, Elferich J, Goehring A, Zhao H, Schuck P, Gouaux E (2018) Structure of mouse  
831 protocadherin 15 of the stereocilia tip link in complex with LHFPL5. *eLife* 7.
- 832 Géléoc GS, Lennan GW, Richardson GP, Kros CJ (1997) A quantitative comparison of  
833 mechano-electrical transduction in vestibular and auditory hair cells of neonatal mice.  
834 *Proc R Soc Lond B* 264:611-621.
- 835 Gillespie PG, Muller U (2009) Mechanotransduction by hair cells: models, molecules, and  
836 mechanisms. *Cell* 139:33-44.

- 837 Greenwood DD (1990) A cochlear frequency-position function for several species—29 years  
838 later. *The Journal of the Acoustical Society of America* 87:2592-2605.
- 839 Gummer AW, Hemmert W, Zenner HP (1996) Resonant tectorial membrane motion in the  
840 inner ear: its crucial role in frequency tuning. *Proc Natl Acad Sci USA* 93:8727-8732.
- 841 Hacoen N, Assad J, Smith W, Corey D (1989) Regulation of tension on hair-cell transduction  
842 channels: displacement and calcium dependence. *Journal of Neuroscience* 9:3988-3997.
- 843 Happel J, Brenner H (2012) *Low Reynolds number hydrodynamics: with special applications*  
844 *to particulate media*: Springer Science & Business Media.
- 845 Holton T, Hudspeth AJ (1983) A micromechanical contribution to cochlear tuning and  
846 tonotopic organization. *Science* 222:508-510.
- 847 Howard J, Hudspeth A (1988) Compliance of the hair bundle associated with gating of  
848 mechano-electrical transduction channels in the bullfrog's saccular hair cell. *Neuron*  
849 1:189-199.
- 850 Hudspeth AJ (1989) How the ear's works work. *Nature* 341:397-404.
- 851 Hudspeth AJ (2008) Making an effort to listen: mechanical amplification in the ear. *Neuron*  
852 59:530-545.
- 853 Hudspeth AJ (2014) Integrating the active process of hair cells with cochlear function. *Nature*  
854 *reviews Neuroscience* 15:600-614.
- 855 Hudspeth AJ, Gillespie PG (1994) Pulling springs to tune transduction: adaptation by hair  
856 cells. *Neuron* 12:1-9.
- 857 Hudspeth AJ, Julicher F, Martin P (2010) A critique of the critical cochlea: Hopf--a bifurcation-  
858 -is better than none. *Journal of neurophysiology* 104:1219-1229.
- 859 Indzhukulian AA, Stepanyan R, Nelina A, Spinelli KJ, Ahmed ZM, Belyantseva IA, Friedman TB,  
860 Barr-Gillespie PG, Frolenkov GI (2013) Molecular remodeling of tip links underlies  
861 mechanosensory regeneration in auditory hair cells. *PLoS biology* 11:e1001583.
- 862 Jaramillo F, Hudspeth AJ (1993) Displacement-clamp measurement of the forces exerted by  
863 gating springs in the hair bundle. *Proc Natl Acad Sci U S A* 90:1330-1334.
- 864 Johnson SL, Beurg M, Marcotti W, Fettiplace R (2011) Prestin-driven cochlear amplification is  
865 not limited by the outer hair cell membrane time constant. *Neuron* 70:1143-1154.
- 866 Kachar B, Parakkal M, Kurc M, Zhao Y, Gillespie PG (2000) High-resolution structure of hair-  
867 cell tip links. *Proc Natl Acad Sci USA* 97:13336-13341.

- 868 Kang H, Wen Q, Janmey PA, Tang JX, Conti E, MacKintosh FC (2009) Nonlinear elasticity of  
869 stiff filament networks: strain stiffening, negative normal stress, and filament alignment  
870 in fibrin gels. *The Journal of Physical Chemistry B* 113:3799-3805.
- 871 Kazmierczak P, Sakaguchi H, Tokita J, Wilson-Kubalek EM, Milligan RA, Muller U, Kachar B  
872 (2007) Cadherin 23 and protocadherin 15 interact to form tip-link filaments in sensory  
873 hair cells. *Nature* 449:87-91.
- 874 Kennedy HJ, Crawford AC, Fettiplace R (2005) Force generation by mammalian hair bundles  
875 supports a role in cochlear amplification. *Nature* 433:880-883.
- 876 Kennedy HJ, Evans MG, Crawford AC, Fettiplace R (2003) Fast adaptation of  
877 mechano-electrical transducer channels in mammalian cochlear hair cells. *Nat Neurosci*  
878 6:832-836.
- 879 Kennedy HJ, Evans MG, Crawford AC, Fettiplace R (2006) Depolarization of cochlear outer  
880 hair cells evokes active hair bundle motion by two mechanisms. *Journal of Neuroscience*  
881 26:2757-2766.
- 882 Kros CJ, Rusch A, Richardson GP (1992) Mechano-electrical transducer currents in hair cells  
883 of the cultured neonatal mouse cochlea. *Proceedings Biological sciences / The Royal*  
884 *Society* 249:185-193.
- 885 Leith D (1987) Drag on Nonspherical Objects. *Aerosol Science and Technology* 6:153-161.
- 886 Lewis ER, Leverenz EL, Koyama H (1982) The tonotopic organization of the bullfrog  
887 amphibian papilla, an auditory organ lacking a basilar membrane. *Journal of*  
888 *comparative physiology* 145:437-445.
- 889 Lim DJ (1986) Functional structure of the organ of Corti: a review. *Hear Res* 22:117-146.
- 890 Manley GA, Yates GK, Köppl C (1988) Auditory peripheral tuning: evidence for a simple  
891 resonance phenomenon in the lizard *Tiliqua*. *Hearing research* 33:181-189.
- 892 Markin VS, Hudspeth AJ (1995) Gating-spring models of mechano-electrical transduction by  
893 hair cells of the internal ear. *Annu Rev Biophys Biomol Struct* 24:59-83.
- 894 Marquis RE, Hudspeth AJ (1997) Effects of extracellular Ca<sup>2+</sup> concentration on hair-bundle  
895 stiffness and gating-spring integrity in hair cells. *Proc Natl Acad Sci USA* 94:11923-11928.
- 896 Martin P (2008) Active hair-bundle motility of the hair cells of vestibular and auditory organs.  
897 In: *Active processes and otoacoustic emissions in hearing* (Manley GA, Popper AN, Fay  
898 RR, eds), pp 93-143. New York: Springer.

- 899 Martin P, Hudspeth AJ, Jülicher F (2001) Comparison of a hair bundle's spontaneous  
900 oscillations with its response to mechanical stimulation reveals the underlying active  
901 process. *Proc Natl Acad Sci USA* 98:14380-14385.
- 902 Michalski N, Petit C (2015) Genetics of auditory mechano-electrical transduction. *Pflügers*  
903 *Archiv-European Journal of Physiology* 467:49-72.
- 904 Peng AW, Effertz T, Ricci AJ (2013) Adaptation of mammalian auditory hair cell  
905 mechanotransduction is independent of calcium entry. *Neuron* 80:960-972.
- 906 Peng AW, Gnanasambandam R, Sachs F, Ricci AJ (2016) Adaptation Independent Modulation  
907 of Auditory Hair Cell Mechanotransduction Channel Open Probability Implicates a Role  
908 for the Lipid Bilayer. *J Neurosci* 36:2945-2956.
- 909 Peng AW, Belyantseva IA, Hsu PD, Friedman TB, Heller S (2009) Twinfilin 2 regulates actin  
910 filament lengths in cochlear stereocilia. *Journal of Neuroscience* 29:15083-15088.
- 911 Pickles J, Comis S, Osborne M (1984) Cross-links between stereocilia in the guinea pig organ  
912 of Corti, and their possible relation to sensory transduction. *Hearing research* 15:103-  
913 112.
- 914 Ricci A, Crawford A, Fettiplace R (2002) Mechanisms of active hair bundle motion in auditory  
915 hair cells. *Journal of Neuroscience* 22:44-52.
- 916 Ricci AJ, Wu YC, Fettiplace R (1998) The endogenous calcium buffer and the time course of  
917 transducer adaptation in auditory hair cells. *J Neurosci* 18:8261-8277.
- 918 Ricci AJ, Crawford AC, Fettiplace R (2003) Tonotopic variation in the conductance of the hair  
919 cell mechanotransducer channel. *Neuron* 40:983-990.
- 920 Ricci AJ, Kennedy HJ, Crawford AC, Fettiplace R (2005) The transduction channel filter in  
921 auditory hair cells. *J Neurosci* 25:7831-7839.
- 922 Rief M, Gautel M, Oesterhelt F, Fernandez JM, Gaub HE (1997) Reversible unfolding of  
923 individual titin immunoglobulin domains by AFM. *science* 276:1109-1112.
- 924 Roth B, Bruns V (1992) Postnatal development of the rat organ of Corti. II. Hair cell receptors  
925 and their supporting elements. *Anat Embryol* 185:571-581.
- 926 Russell I, Sellick P (1983) Low-frequency characteristics of intracellularly recorded receptor  
927 potentials in guinea-pig cochlear hair cells. *The Journal of Physiology* 338:179-206.
- 928 Russell IJ, Kössl M, Richardson GP (1992) Nonlinear mechanical responses of mouse cochlear  
929 hair bundles. *Proc R Soc Lond B* 250:217-227.

- 930 Schlichting VH (1933) Laminare strahlausbreitung. ZAMM-Journal of Applied Mathematics  
931 and Mechanics/Zeitschrift für Angewandte Mathematik und Mechanik 13:260-263.
- 932 Tilney LG, Tilney MS (1988) The actin filament content of hair cells of the bird cochlea is  
933 nearly constant even though the length, width, and number of stereocilia vary  
934 depending on the hair cell location. The Journal of cell biology 107:2563-2574.
- 935 Tilney LG, Tilney MS, DeRosier DJ (1992) Actin filaments, stereocilia, and hair cells: how cells  
936 count and measure. Annual review of cell biology 8:257-274.
- 937 Tinevez JY, Julicher F, Martin P (2007) Unifying the various incarnations of active hair-bundle  
938 motility by the vertebrate hair cell. Biophysical journal 93:4053-4067.
- 939 Tirado MM, Torre JGdl (1979) Translational friction coefficients of rigid, symmetric top  
940 macromolecules. Application to circular cylinders. The Journal of Chemical Physics  
941 71:2581-2587.
- 942 Turner RG, Muraski AA, Nielsen DW (1981) Cilium length: influence on neural tonotopic  
943 organization. Science.
- 944 Viberg A, Canlon B (2004) The guide to plotting a cochleogram. Hear Res 197:1-10.
- 945 Vilfan A, Duke T (2003) Two adaptation processes in auditory hair cells together can provide  
946 an active amplifier. Biophysical journal 85:191-203.
- 947 Waguespack J, Salles FT, Kachar B, Ricci AJ (2007) Stepwise morphological and functional  
948 maturation of mechanotransduction in rat outer hair cells. J Neurosci 27:13890-13902.
- 949 Wright A (1984) Dimensions of the cochlear stereocilia in man and the guinea pig. Hear Res  
950 13:89-98.
- 951
